1 Title: Pathfinder: open source software for analyzing spatial navigation search strategies

2 Authors: Matthew B. Cooke<sup>1</sup>, Timothy P. O’Leary<sup>1</sup>, Phelan Harris<sup>1</sup>, Richard E. Brown<sup>2</sup>, Jason S.  
3 Snyder<sup>1\*</sup>

4 Author Contributions: Developed software (MBC, PH), performed experiments (TPO), analyzed  
5 data (MBC, TPO, JSS), wrote manuscript (JSS), edited manuscript (MBC, TPO, REB), provided  
6 funding (JSS, REB)

7 \*corresponding author: [jasonsnyder@psych.ubc.ca](mailto:jasonsnyder@psych.ubc.ca), 604-822-3269

8 Affiliation: <sup>1</sup>Department of Psychology  
9 Djavad Mowafaghian Centre for Brain Health  
10 University of British Columbia  
11 2211 Wesbrook Mall  
12 Vancouver, British Columbia  
13 Canada V6T 2B5

14 <sup>2</sup>Psychology and Neuroscience Department  
15 Dalhousie University  
16 Halifax, Nova Scotia  
17 Canada B3H 4R2  
18

19 Abstract: Spatial navigation is a universal behavior that varies depending on goals, experience and  
20 available sensory stimuli. Spatial navigational tasks are routinely used to study learning, memory and  
21 goal-directed behavior, in both animals and humans. One popular paradigm for testing spatial memory  
22 is the Morris water maze, where subjects learn the location of a hidden platform that offers escape from  
23 a pool of water. Researchers typically express learning as a function of the latency to escape, though this  
24 reveals little about the underlying navigational strategies. Recently, a number of studies have begun to  
25 classify water maze search strategies in order to clarify the precise spatial and mnemonic functions of  
26 different brain regions, and to identify which aspects of spatial memory are disrupted in disease models.  
27 However, despite their usefulness, strategy analyses have not been widely adopted due to the lack of  
28 software to automate analyses. To address this need we developed Pathfinder, an open source  
29 application for analyzing spatial navigation behaviors. In a representative dataset, we show that  
30 Pathfinder effectively characterizes the development of highly-specific spatial search strategies as male  
31 and female mice learn a standard spatial water maze. Pathfinder can read data files from commercially-  
32 and freely-available software packages, is optimized for classifying search strategies in water maze  
33 paradigms, but can also be used to analyze 2D navigation by other species, and in other tasks, as long  
34 as timestamped xy coordinates are available. Pathfinder is simple to use, can automatically determine  
35 pool and platform geometry, generates heat maps, analyzes navigation with respect to multiple goal  
36 locations, and can be updated to accommodate future developments in spatial behavioral analyses.  
37 Given these features, Pathfinder may be a useful tool for studying how navigational strategies are  
38 regulated by the environment, depend on specific neural circuits, and are altered by pathology.  
39

40 Keywords: search strategy, water maze, learning, memory, rodent, reversal, goal  
41

## 1 INTRODUCTION

2

3 All living organisms move throughout space to survive. Amongst mammals, there is a  
4 diversity of spatial behaviors that depend on numerous factors such as anxiety<sup>1,2</sup>, learning<sup>3</sup>, and  
5 the nature and pattern of stimuli that predict goals<sup>4-6</sup>. Given rodents' natural propensity to  
6 explore stimuli and environments, an array of rodent navigational tasks have been developed  
7 to investigate how various brain regions interact to control goal-direct behavior<sup>7</sup>. This has  
8 routinely been conducted using fixed-trajectory mazes such as the T-maze or radial maze.  
9 While these dry maze paradigms offer the convenience of fixed choice points that reduce  
10 ambiguity associated with classifying decisions and navigational responses, they cannot be  
11 used to study patterns of exploration in open environments.

12 A popular approach for studying free navigation in animals has been the water maze,  
13 where rodents learn the location of a hidden escape platform in a pool of water based on distal  
14 and/or local cue configurations<sup>31</sup>. Early studies validated the usefulness of the water maze for  
15 studying spatial processing and described progressive stages of learning where a rodent  
16 searches for the platform with increasing spatial specificity<sup>8,9</sup>. The vast majority of studies have  
17 since used escape latency or path length as primary measures of spatial learning. However,  
18 water maze navigation is unconstrained and animals can solve the task using different  
19 strategies that may not always differ in terms of the time it takes to reach the platform<sup>8,9</sup>. Thus,  
20 while latency and path length measures are convenient, they discard a rich amount of  
21 behavioral data.

22 Over the years, a number of groups have described manual and automated methods  
23 for classifying search strategies used by animals and humans in water maze experiments<sup>8,10-19</sup>.  
24 By mathematically relating the swim path to features of the maze environment one can identify  
25 and quantify the types of search strategies employed. Search strategy analyses have revealed  
26 that the ventral hippocampus is involved in coarse spatial goal-directed search<sup>16</sup>, that adult  
27 neurogenesis promotes spatially precise search<sup>20</sup>, and that spatially accurate search is reduced  
28 in humans with, and/or animal models of, Alzheimer's disease<sup>21,22</sup>, autism<sup>23</sup>, traumatic brain  
29 injury<sup>22,24</sup> and aging<sup>14,25</sup>. Despite the utility of these analyses they have been relatively  
30 uncommon to date, likely because commercially-available software packages often do not  
31 perform these analyses and the analytic methods used in previous work are not typically  
32 available in the form of an easy-to-use software package.

33 To facilitate the study of navigational search strategies, whether in the water maze or  
34 other 2-dimensional navigational paradigms, we created a new software application called  
35 Pathfinder. Pathfinder is a Python-based, open source tool with an intuitive graphical user  
36 interface and adjustable parameters for conducting detailed analyses of spatial search patterns.  
37 We validate Pathfinder with a mouse water maze dataset, where we find that male and female  
38 mice develop increasingly specific and direct spatial search strategies with additional days of  
39 training.

40

41

## 1 METHODS

2

### 3 Installation and Dependencies

4 Pathfinder is freely available under the GNU General Public License version 3.0.  
5 Detailed instructions on use and installation of the program can be found on Github at  
6 [github.com/MatthewBCooke/Pathfinder](https://github.com/MatthewBCooke/Pathfinder). We recommend installing Anaconda for Python 3, as  
7 it includes all of the following packages that are needed to run Pathfinder: PIL  
8 (<https://pillow.readthedocs.io/en/latest/>), xlrd (<https://xlrd.readthedocs.io/en/latest/>), numpy  
9 (<https://www.numpy.org>), pickle (<https://docs.python.org/3/library/pickle.html>), scipy  
10 (<https://www.scipy.org>), matplotlib (<https://matplotlib.org>), tkinter  
11 (<https://wiki.python.org/moin/TkInter>). The MATLAB engine is optional and needs to be  
12 installed separately for entropy calculations (MATLAB and Statistics Toolbox Release 2018b,  
13 The MathWorks, Inc., Natick, Massachusetts, United States). Once Anaconda is installed,  
14 Pathfinder can be downloaded via Github or by typing “pip install pathfinder” in a shell  
15 window (i.e. Mac terminal or Windows command line). Pathfinder is then opened by typing  
16 “pathfinder” into the shell window and pressing return.

17

### 18 General Usage

19 Pathfinder has a simple, user-friendly interface for extracting information from spatial  
20 navigation tracking files that contain xy coordinates over time (Fig. 1). While it can be used to  
21 analyze multiple types of 2D navigational data, it is optimized for rodent spatial water maze  
22 experiments and accepts inputs from commonly-used commercial tracking software, including  
23 Ethovision (Noldus), Anymaze (Stoelting) and WaterMaze (Actimetrics). Pathfinder can also open  
24 files exported from the open source tracking software, ezTrack<sup>26</sup>, enabling a cost-effective and  
25 fully open source workflow for detailed water maze behavioral analyses. Trial information from  
26 these programs are outputted in CSV or Excel format, which can then be inputted into  
27 Pathfinder through the File menu. The experimental setup is specified in the main window (Fig.  
28 1a). Pathfinder can automatically calculate the position and size of the maze and the goal  
29 location (provided they are constant across trials), or these parameters can be entered  
30 manually.

31 Pathfinder relies on several variables that describe navigation relative to the pool and  
32 platform geometry: 1) Ideal Path Error (IPE) is the summed error of the search path (Fig. 1c). It  
33 is conceptually similar to the Cumulative Search Error (CSE) since it also measures proximity to  
34 the goal throughout the trial<sup>9,27</sup>. An advantage of proximity measures is that they can  
35 distinguish 2 trials that have equivalent latencies/path lengths but differ in average distance to  
36 the platform. When calculating the IPE, the distance from the goal is measured at each time  
37 point in the trial and summed to generate a cumulative distance measure of the actual path  
38 (similar to CSE). In contrast to the CSE, the IPE is calculated by subtracting the cumulative ideal  
39 path distance from the cumulative actual path distance. The cumulative ideal path is simply the  
40 sum of all of the distances between the goal and the position of the animal if it swam along a  
41 straight line to escape, using the average velocity from the trial. 2) Heading error is the angular  
42 distance between the current path and a straight line to the goal location. The current path  
43 direction is defined by a line connecting 2 temporally-adjacent xy coordinates. The average

1 heading error is an average of all of the heading error values for the trial and the initial heading  
2 error is the average of the heading error values for the first second of the trial. Additional  
3 variables are user-defined on the main window: 3) Angular Corridor Width: the size of the  
4 angular navigational corridor (in degrees) that extends from the start location and widens  
5 towards the goal, centered on the goal location, 4) Chaining Annulus Width: the width of the  
6 chaining annulus, a donut-shaped zone that is centered on the goal and spans all areas of the  
7 maze at a fixed distance from the maze wall. 5) Thigmotaxis zone size: the width of a zone that  
8 spans the perimeter of the maze and extends inward from the maze wall. Pathfinder also  
9 defines a "small" thigmotaxis zone that is half the width of this value. 6) Add goal: Pathfinder  
10 will perform all calculations and strategy analyses with respect to an unlimited number of goal  
11 locations. This can be used to measure performance and characterize strategies with respect to  
12 multiple goal locations (e.g. during spatial reversal, spatial choice). Selecting "truncate trials"  
13 will artificially end the trials if/when the subject reaches the additional goal locations. This is  
14 necessary, for example, to measure direct trajectories to a former goal location in a reversal  
15 paradigm (since the strategy will no longer meet direct path criteria if the former location in  
16 contacted and search continues elsewhere in the maze).

17         Once the variables are defined, boundaries must be set to establish the criteria for  
18 strategy categorization. Clicking "settings" will open up an additional window where strategy  
19 options can be selected and parameter bounds can be set (Fig. 1d). Upon clicking "calculate",  
20 Pathfinder categorizes trials into one of eight search strategies that are ordered according to  
21 the degree of spatial specificity (high to low): 1) direct path, 2) focal search, 3) directed search,  
22 4) indirect search, 5) chaining, 6) scanning, 7) random search, and 8) thigmotaxis. These  
23 categories are mutually exclusive and follow a defined order (1 to 8), but the user can opt to  
24 exclude strategies from the analysis. Thus, Pathfinder determines, in a stepwise fashion,  
25 whether a given trial fulfills the criteria for direct swim. If so, it moves on to categorize the next  
26 trial. If not, it determines whether the trial fits the subsequent strategy, and so on. The  
27 strategies and their parameters are shown in Fig. 2. In the output file (.csv), each trial is  
28 categorized and the following additional metrics are provided: latency and distance travelled  
29 to reach the goal, average distance from the goal, percent of maze traversed, velocity, initial  
30 and average heading error and IPE. Pathfinder also has the ability to calculate the entropy for  
31 each trial, a measure of disorder in the path, relative to the goal location. The entropy  
32 calculation calls the MATLAB engine and requires a MATLAB license. Entropy measures the  
33 performance by looking at a shift from more disordered swimming (high entropy) to more  
34 spatially strategic paths (low entropy), and has been previously found to be highly sensitive to  
35 water maze search performance<sup>28</sup>. Due to the manipulation of large matrices, calculating the  
36 entropy of trials is very slow.

37         Occasionally, some trials cannot be categorized. The user therefore has the option to  
38 manually categorize uncategorized trials, by selecting this option on the main window.  
39 Additionally, there is an option to manually categorize all trials. Here, Pathfinder provides an  
40 image of the trial as well as shortcut keys to select the appropriate strategy. The software will  
41 also display the strategy it had automatically categorized for the displayed trial. Manual  
42 categorization will not overwrite the automatic categorization but will be displayed separately

1 in the output file. This allows for comparison between the automatically calculated and user-  
2 selected strategy.

3 In addition to strategy categorization, Pathfinder will also create heatmaps as a useful  
4 visual representation of groups of trials. This is accomplished by counting the number of times  
5 animal(s) visit each bin in a hexagonal array that is overlaid on the maze (bin size is user-  
6 defined). The range of colors (cool to warm) can be automatically set to occupy the full scale.  
7 Alternatively, the user can manually set the maximum, above which all bins will read the  
8 hottest.

9

## 10 Animals

11 A group of 35 C57BL/6J mice (18 male, 17 female) were used in this experiment. Mice  
12 were housed in same-sex groups (2-4/cage) in polyethylene cages (30cm x 19 cm x 13cm) with  
13 pine chip bedding and a small tube and food and water available *ad-libitum*. Mice were  
14 housed under a reversed light-dark cycle (lights off 8:00am-8:00pm), and completed water-  
15 maze testing in the dark phase. Mice were first tested on the Barnes maze<sup>29</sup> and were 18 weeks  
16 old when tested on the water maze for the current experiment. All procedures adhered to  
17 guidelines from the Canadian Council on Animal Care and were approved by the Dalhousie  
18 University Committee on Laboratory Animals.

19

## 20 Spatial water maze training

21 The water maze consisted of a plastic circular pool (110 cm diameter) painted black.  
22 The pool was filled with water (21-23°C), which was made opaque with the addition of non-  
23 toxic white tempera paint (Schola). A circular escape platform (14 cm height, 9 cm diameter)  
24 was positioned 1 cm below the water. The water maze was placed in a diffusely lit room with  
25 many extra-maze visual cues (posters on walls, a desk, the experimenter, geometric layout of  
26 testing room etc.).

27 Animals were tested over a total of 15 days. They first completed 8 days of acquisition  
28 training (A1-A8) with a hidden escape platform (4 trials/day). Across trials, mice were released  
29 into the pool from four different locations, with the order differing across mice. They were  
30 given a maximum of 60 sec to locate the escape platform, after which they were guided to the  
31 platform by the experimenter. Mice remained on the platform for 15-20 seconds before being  
32 removed from the pool. During daily test sessions, mice were tested in squads of 4 and each  
33 mouse was held in separate cages filled with a bedding of paper towel. The inter-trial interval  
34 ranged from 2-8 minutes. The day following acquisition training, memory was assessed with a  
35 single 60-sec probe trial with no escape platform present. Mice then completed a single day of  
36 re-training (Retrain) to reduce extinction that may occur during the probe trial. During re-  
37 training the escape platform is returned to the same location used in acquisition training.

38 After acquisition re-training, reversal learning was assessed over 3 days (R1-R3) with the  
39 escape platform moved to the opposite side of the maze. A reversal probe trial (R probe) was  
40 then completed to assess memory for the location of the new escape platform location. Finally,  
41 a single day of visible platform training (Visible platform; 4 trials) was completed, where the  
42 escape platform was moved to a new location, and made visible with the addition of a striped

1 flag. Behaviour was recorded with the WaterMaze (Actimetrics) video tracking system (5  
2 samples per second), via a camera placed directly above the pool.

## 3 4 RESULTS

5  
6 To validate Pathfinder, we trained mice for 8 days on a spatial water maze such that  
7 they achieved asymptotic performance according to standard metrics, and should therefore  
8 have adopted distinct navigational strategies as they learned the procedural and spatial task  
9 demands. Following acquisition, mice received an unreinforced probe trial, 1 day of retraining,  
10 3 days of reversal training (platform in opposite side of pool), another probe trial, and one day  
11 of visible platform training (outlined in Fig. 3a).

12 To confirm that mice learned the task, we first analyzed performance using several  
13 metrics that indicate learning but do not reveal details about navigational strategies (Fig. 3).  
14 We focussed on acquisition and reversal phases since they are the main focus of our  
15 subsequent strategy analyses. Over the 8 days of acquisition, mice reached the platform faster,  
16 increasingly swam in the direction of the platform as measured by heading angle error, and  
17 had lower IPE and entropy scores. The greatest performance improvements occurred during  
18 the first 4 days and, while all measures revealed improvements beyond day 4, only average  
19 heading error and entropy analyses revealed improvements beyond day 5. There were no sex  
20 differences in acquisition performance.

21 Reversal learning performance improvements were mostly apparent after the first day of  
22 training, likely because mice had learned the procedural aspects of the task and the spatial  
23 environment, and only had to learn a new platform location (Fig. 3g-k)<sup>30</sup>. Path entropy  
24 decreased from days 2-3, indicating continued learning. Females and males were equivalent in  
25 all performance measures except males had a lower initial heading error on day 1 of reversal  
26 training (Fig. 3h).

27 Pathfinder revealed clear differences in search strategies over days of training (Fig. 4).  
28 Over the first 2 days of acquisition, mice were initially thigmotaxic. After learning that the pool  
29 wall did not afford escape, they then transitioned to chaining, random and scanning search  
30 patterns, all of which indicate spatially non-specific search away from the pool wall. Over days  
31 2-3 mice transitioned to spatially-specific forms of search, with ~30% performing indirect  
32 searches to locate the platform. A similar proportion of trials were indirect searches over days  
33 2-8 of training. Mice increasingly displayed directed searches, focal searches and direct paths  
34 such that, by the end of training, search was spatially specific on over 80% of trials. There were  
35 no major sex differences in strategy. The usefulness of strategy analyses (at least with default  
36 settings) for long probe trials is limited since spatially-specific strategies rely on IPE, which  
37 rapidly increases with trial duration. Additionally, animals will change strategies as they learn  
38 that the escape platform is not available in the expected location. Indeed, when the probe trial  
39 analysis was restricted to the first 10s, mice displayed focal and directed search strategies,  
40 indicating perseveration at the former platform location. When the analysis was conducted on  
41 longer segments, chaining was common, indicating that mice adopted a procedural strategy of  
42 searching in similar regions throughout the pool. Finally, when examining the entire probe trial,  
43 scanning and random searches dominated, indicating that mice eventually abandoned

1 strategies that were no longer successful. During reversal, spatial specificity was initially very  
2 poor; mice primarily scanned, indicating preserved knowledge of the procedural requirements  
3 but no knowledge of the platform location. By the end of day 2 mice displayed levels of  
4 spatially-specific search strategies that were comparable to those at the end of the acquisition  
5 phase. Using the “add goal” feature, we also analyzed reversal strategies with respect to the  
6 original goal location Fig. 4b). This revealed a number of direct paths to the goal on the first  
7 day that quickly dissipated with additional trials as mice learning the new platform location.

8 To investigate possible relationships between strategy and conventional measures of  
9 water maze performance, we examined escape latencies for each strategy type, over all trials  
10 (1888 trials from all 15 days of testing; Fig. 4c). Direct swim trials had the lowest latencies (2.9s  
11 on average) and was followed by the other spatially-specific strategies (focal search, 3.6s;  
12 directed search, 6.7s; indirect search, 5.8s). Non-specific strategies that avoided the pool wall  
13 were all significantly worse than the spatially specific strategies (chaining, 29s; scanning, 32s;  
14 random, 38s), and thigmotaxic trials were significantly worse than all other trial types (58s).

15 To determine how Pathfinder compared to subjective assessment of strategy, we  
16 compared Pathfinder categorization to manual scores generated by 2 independent raters (all  
17 trials). Rater 1 had experience in mouse behavior testing, but only brief training on water maze  
18 strategy classification. Rater 2 developed Pathfinder and had extensive experience with  
19 strategy classification. Figure 4d shows the proportion of Pathfinder-categorized trials that  
20 received the same strategy classification via the manual raters. The greatest correspondence  
21 between automatic and manual categorization was seen for direct swims and thigmotaxis  
22 (~80% for both). Automatic-manual consistency was much lower for the other strategies,  
23 ranged from 25-75% and differed for the 2 raters. Overall consistency between the 2 manual  
24 raters was 65%. These data highlight the difficulty of intuitively differentiating complex search  
25 paths. Interestingly, when we averaged strategy analyses over all 15 days of testing, automatic  
26 and manual categorization resulted in similar patterns (Fig. 4e-g). Thus, manual scoring is  
27 unreliable at the level of an individual trial, and human error can be masked when data are  
28 averaged.

29 To provide an intuitive visual inspection of search performance, we used Pathfinder to  
30 generate heatmaps of spatial occupancy at stages of testing that differed in spatial search  
31 patterns (Fig. 5). Averaged over all trials and across sexes, mice swam in close proximity to the  
32 pool wall on day 1 of initial acquisition. By days 3 and 8 search was increasingly focussed near  
33 the goal. Spatial preference was clearest on the probe trial, since these trials provided a longer  
34 temporal window to accumulate spatial occupancy samples. Day 1 of reversal testing  
35 resembled the probe trial, since mice spent the majority of time in the former platform  
36 location. By day 3, and on the probe trial, their spatial preference had shifted to the new,  
37 correct location. One set of heatmaps are presented using Pathfinder’s auto scale feature,  
38 which maximizes the color range within a trial and can be useful for visualizing within-trial  
39 details since it avoids saturation. However, by differentially scaling, it can also obscure or inflate  
40 differences across trials. We therefore include a second set of heatmaps that are all scaled  
41 equivalently.

42  
43

## 1 DISCUSSION

2

3 Here we describe Pathfinder, an easy-to-use software package for analyzing patterns of  
4 spatial navigation. Pathfinder performs automatic classification of multiple search strategies  
5 that have been previously described in the rodent water maze, but it can also be used for  
6 analyzing navigational behavior in dry mazes, virtual mazes or any other environment where xy  
7 coordinates are provided. Currently, Pathfinder accepts inputs from 3 commonly-used,  
8 commercially-available tracking programs (Ethovision, Anymaze, Watermaze) and also the  
9 freely-available tracking software, ezTrack<sup>26</sup>. It requires no programming knowledge, but is  
10 open source and can be expanded by developers in the future. Using a mouse water maze  
11 dataset, we validated Pathfinder's performance and found that mice progressed through a  
12 series of search strategies that had increasing levels of spatial search specificity, consistent with  
13 earlier reports<sup>20,21 16-18,25,31</sup>. Mice initially displayed thigmotaxic, random and chaining search  
14 strategies as they learned the procedural components of the task. Pathfinder effectively  
15 demonstrated that mice transitioned to spatially-specific, presumably hippocampal-dependent,  
16 strategies during the later stages of training. Pathfinder also revealed the reverse transition  
17 from spatial to procedural to random strategies in the probe trial. By analyzing reversal  
18 performance with respect to multiple goal locations, Pathfinder showed that mice redirect their  
19 spatial search from the previously-reinforced platform location to the new location. Mice  
20 displayed a variety of search strategies on any given day, even after escape latency  
21 performance had plateaued. Since manual classification based on static images of swim paths  
22 was slow and inconsistent, Pathfinder may therefore be a useful tool for objectively  
23 characterizing swim strategies in the rodent water maze and 2D spatial navigation in other  
24 behavioral paradigms.

25 The water maze was initially described nearly 40 years ago and quickly became popular  
26 due to the ease of training, strong motivation for escape, and consistent reliance on  
27 hippocampal function<sup>3,32</sup>. Escape latency and path length were quickly adopted as the primary  
28 measures of learning and, due to their simplicity and sufficiency for many experimental  
29 situations, they remain the most commonly-used metrics. However, they cannot always  
30 differentiate between behaviors that vary in the degree of spatial bias. For example, animals  
31 that employ a chaining strategy search nonspecifically but in some cases can reach the  
32 platform as fast as animals that perform a directed spatial search (Fig. 4c). Latency and path  
33 length are also less capable of detecting age-related impairments in spatial learning,  
34 prompting development of measures of proximity to the goal location, which has proven to be  
35 highly sensitive to group differences in both training and probe trial performance<sup>9,27,33</sup>. Our IPE  
36 proximity measure is similar to previous proximity measures with the exception that the  
37 cumulative ideal path distance is subtracted from the cumulative actual path distance to  
38 generate a path error measure. Finally, another recent metric that has been reported to be  
39 even more sensitive to group differences in spatial probe trial performance is entropy<sup>28</sup>.  
40 Entropy is originally a measure of thermodynamic disorder in a system but, when applied to  
41 the distribution of sampled sites in a maze, can also be used to measure the transition from  
42 high to low disorder in navigation, as animals focus their search on the precise goal location.  
43 By default, Pathfinder applies equal weighting to the path and goal components of the entropy



1 measure and, compared to standard metrics, entropy was slightly better at detecting  
2 performance changes during the later stages of water maze acquisition.

3         Despite their convenience, even the most precise individual measures cannot  
4 distinguish between multiple possible strategies that an animal might employ to reach a goal  
5 location. Thus, strategy analyses may be valuable for identifying the role that different circuits  
6 play in guiding behavior. Consistent with the lower spatial resolution of ventral hippocampal  
7 place cells<sup>34</sup>, strategy analyses have found that the ventral hippocampus is particularly  
8 important for developing coarse, non-specific search patterns in the water maze and that  
9 increasingly spatially localized search depends on sequential recruitment of intermediate and  
10 then dorsal hippocampus<sup>16</sup>. Adult-born neurons are believed to promote memory precision  
11 and, indeed, blocking neurogenesis greatly reduced the adoption of spatially-specific search  
12 strategies<sup>20</sup>. Strategy analyses in animals have revealed spatial precision-related deficits in  
13 models of aging<sup>25</sup>, stroke<sup>35</sup>, traumatic brain injury<sup>22,24</sup>, autism<sup>23</sup> and Alzheimer's pathology<sup>21,22</sup>.  
14 With the advent of virtual reality, it has also become possible to test whether rodent water  
15 maze findings generalize to humans<sup>15</sup>. Indeed, hippocampal damage and CA1-specific lesions  
16 impair human water maze performance according to standard measures such as latency to  
17 reach the platform<sup>36,37</sup>. Human water maze experiments have also revealed superior spatial  
18 memory and greater spatial strategy use in younger individuals, and in males compared to  
19 females<sup>14</sup>. Here, we did not observe any sex differences, possibly because these mice had  
20 been previously tested in a Barnes maze<sup>29</sup>, which may have normalized stress reactivity and  
21 resulted in equal performance in males and females<sup>38-40</sup>.

22         Given the apparent utility of strategy classification, the question arises as to why it has  
23 not been used more extensively. One likely explanation is that it is not a standard feature of  
24 commercially-available software packages, therefore requiring time and programming  
25 experience to execute. Groups that have performed strategy analyses have developed their  
26 own software, using either a predefined parameter-based approach, like ours, or machine  
27 learning algorithms that classify based on user input<sup>8,11,12,15-20,25,41</sup>. Since most previous  
28 approaches have not been developed into freely-available software packages, Pathfinder may  
29 enable more widespread adoption of strategy analyses. Moreover, in conjunction with freely-  
30 available tracking programs such as ezTrack (which is already supported) or others<sup>41</sup>, users  
31 should be able to easily perform advanced navigation analyses at little cost.

32         It is worth noting that, with respect to water maze analyses, some behaviors (e.g.  
33 chaining and thigmotaxis) have been relatively well-described. In contrast, differences between  
34 spatially-specific search patterns (direct swim, directed search, focal search, indirect search)  
35 may be intuitive and quantifiable but the extent to which they are meaningful and result from  
36 distinct neural processes is less clear. Certainly, the fact that search strategies can now be  
37 easily quantified opens the door to future studies of the biology of complex navigation  
38 strategies. However, to some extent, strategy definitions are arbitrary and it is therefore  
39 incumbent upon the user to determine which behaviors are relevant for their experimental  
40 paradigm.

41  
42  
43

## 1 Future developments and additional uses

2 One area where Pathfinder could be useful is for assessing spatial bias and choice  
3 behavior when there are multiple goal locations. Indeed, the water maze has been effectively  
4 used to study visuospatial goal discrimination<sup>42,43</sup> and cue vs place-related choice behavior<sup>44,45</sup>.  
5 We have recently used Pathfinder to show that neurogenesis promotes spatial platform  
6 preference in a spatial alternation water maze, which was detected by a greater number of  
7 direct swims when the platform was in the rat's preferred location than when it was in the non-  
8 preferred location<sup>46</sup>. Neurogenesis-deficient rats often vacillated between the two platform  
9 locations, similar to vicarious trial and error behavior that has been described at choice points  
10 in dry mazes<sup>47</sup>. Future software developments could possibly incorporate these types of  
11 movements between competing goal options to detect indecisiveness as animals refine goal-  
12 directed navigation behavior. Swim speeds are also currently not factored into Pathfinder's  
13 classification scheme, but could provide useful additional information for strategies that  
14 incorporate goal expectancy<sup>48,49</sup> or a transition between place- and cue-directed navigation<sup>5</sup>. In  
15 the water maze, multiple platform locations (> 2) are typically only used in matching-to-place  
16 variants where it is expected that subjects quickly forget previous goal locations<sup>30</sup>. However,  
17 there is evidence that search patterns can reflect memory for many individual goal locations as  
18 well as the overall distribution of goals, at recent and remote post-training intervals,  
19 respectively<sup>6</sup>. Since Pathfinder can analyze navigation with respect to an unlimited number of  
20 goal locations, it may be useful for future investigations of how multiple spatial goals interact to  
21 guide search.

22 Spatial navigation and exploration have been studied in many paradigms and so it is  
23 worth reiterating that Pathfinder could be applied to study navigation by any species, in any  
24 open 2D environment, and not just the water maze. For example, it could be used to measure  
25 the spatial precision of homing behavior<sup>50,51</sup>, spatial preferences of mammals or invertebrates in  
26 novel environments<sup>52-54</sup>, or navigation with respect to other environmental features that are  
27 known to drive firing of select populations of neurons, such as local and distal cues<sup>55</sup>,  
28 objects<sup>56,57</sup> and environmental borders<sup>58</sup>. An array of virtual environments also opens the door  
29 to similar analyses of spatial navigation in humans<sup>36,37,59,60</sup>. Finally, eye tracking data, as humans  
30 and nonhuman primates explore 2D scenes, provides a measure of navigation that is  
31 analogous to rodent spatial exploration<sup>61</sup>. Indeed, hippocampal-damaged subjects display  
32 disorganized, inefficient search in a scene exploration task and are impaired according to  
33 several water maze-inspired metrics such as cumulative search error and heading angle error<sup>62</sup>.  
34 As a user-friendly application that can be further developed to accommodate differences  
35 between these various paradigms, Pathfinder may be a useful tool for characterizing complex  
36 spatial behavior and bridging findings across humans and animal models.

37

## 38 ACKNOWLEDGEMENTS

39 The authors thank Sabri Snyder for contributing the name, Pathfinder, and Kurt Stover for  
40 contributing initial work towards automatic strategy classification. This work was funded by the  
41 Canadian Institutes of Health Research (JSS), the Natural Sciences and Engineering Research  
42 Council (JSS, REB), and the Michael Smith Foundation for Health Research (JSS, TPO).

43

1   COMPETING INTERESTS

2   The author(s) declare no competing interests.

3

4   DATA AVAILABILITY

5   The datasets analysed in the current study are available from the corresponding author on  
6   reasonable request. The software, Pathfinder, is freely available at  
7   [github.com/MatthewBCooke/Pathfinder](https://github.com/MatthewBCooke/Pathfinder).

8

9

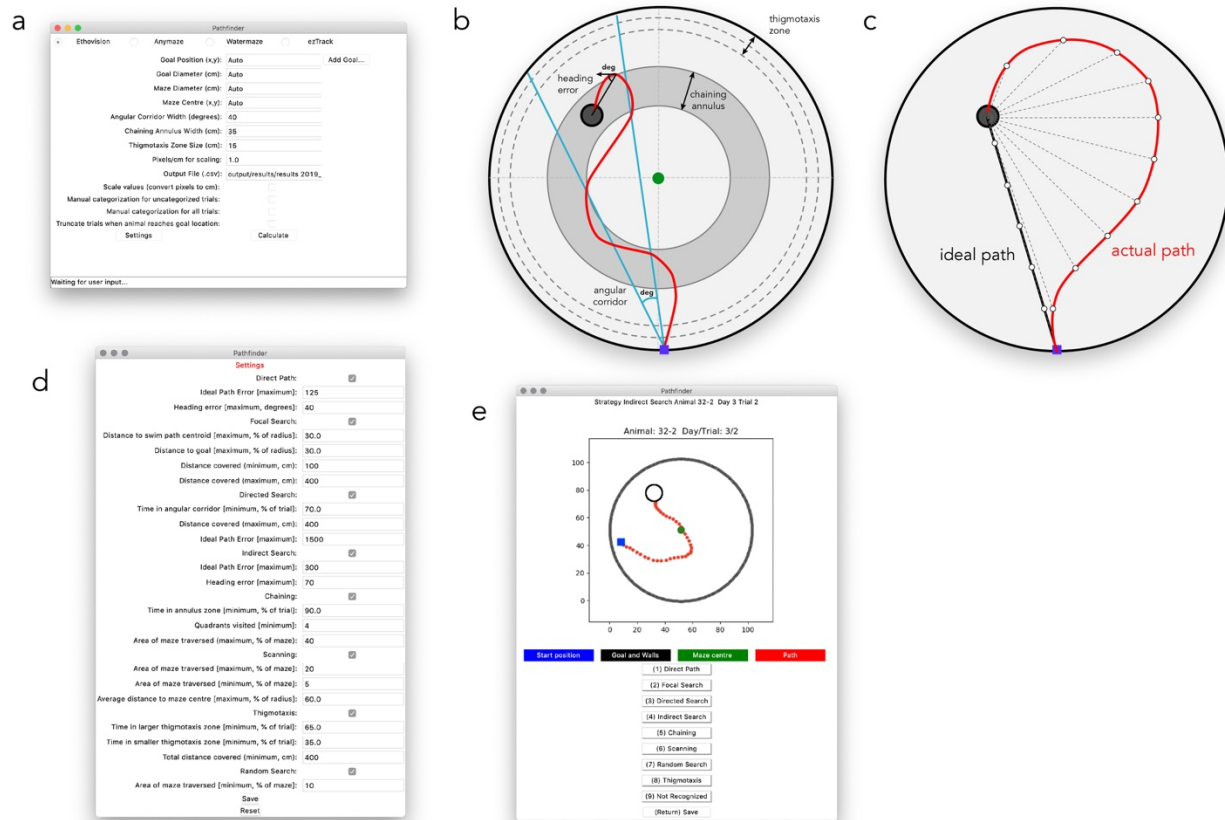

1  
2 Figure 1: Graphical user interface and setting parameters. a) Screenshot of the main application window,  
3 where maze geometry is defined and input and output settings are established. b) Maze schematic and  
4 geometry for defining variables. The chaining corridor is centered on the goal platform and extends  
5 throughout all 4 quadrants; its width is specified in the main window. The larger thigmotaxis zone is  
6 specified in the main window; Pathfinder calculates the smaller thigmotaxis zone as half the width.  
7 Heading error is the angular distance between the actual path direction and a straight line to the goal  
8 (Pathfinder calculates average heading error at all points; only a single example shown). The angular  
9 corridor is used to define the directed search strategy, which depends on the accuracy of the animal's  
10 trajectory as it approaches the platform. The width of the corridor (in degrees) is specified in the main  
11 window, and is centered on the goal. c) Schematic of the Ideal Path Error (IPE) metric. The distance from  
12 the platform is measured at each timepoint provided by the tracking software (actual path; only a  
13 fraction of distances shown for clarity) to provide a cumulative distance measure. Assuming the same  
14 swim speed as the actual path, distances are similarly summed from the ideal path, to provide a  
15 cumulative ideal path measure. The ideal cumulative distance is subtracted from the actual cumulative  
16 distance to generate the IPE. d) Parameter bounds are entered in the settings window. e) The manual  
17 categorization window, for viewing trial paths and manually categorizing strategies.

18  
19  
20  
21

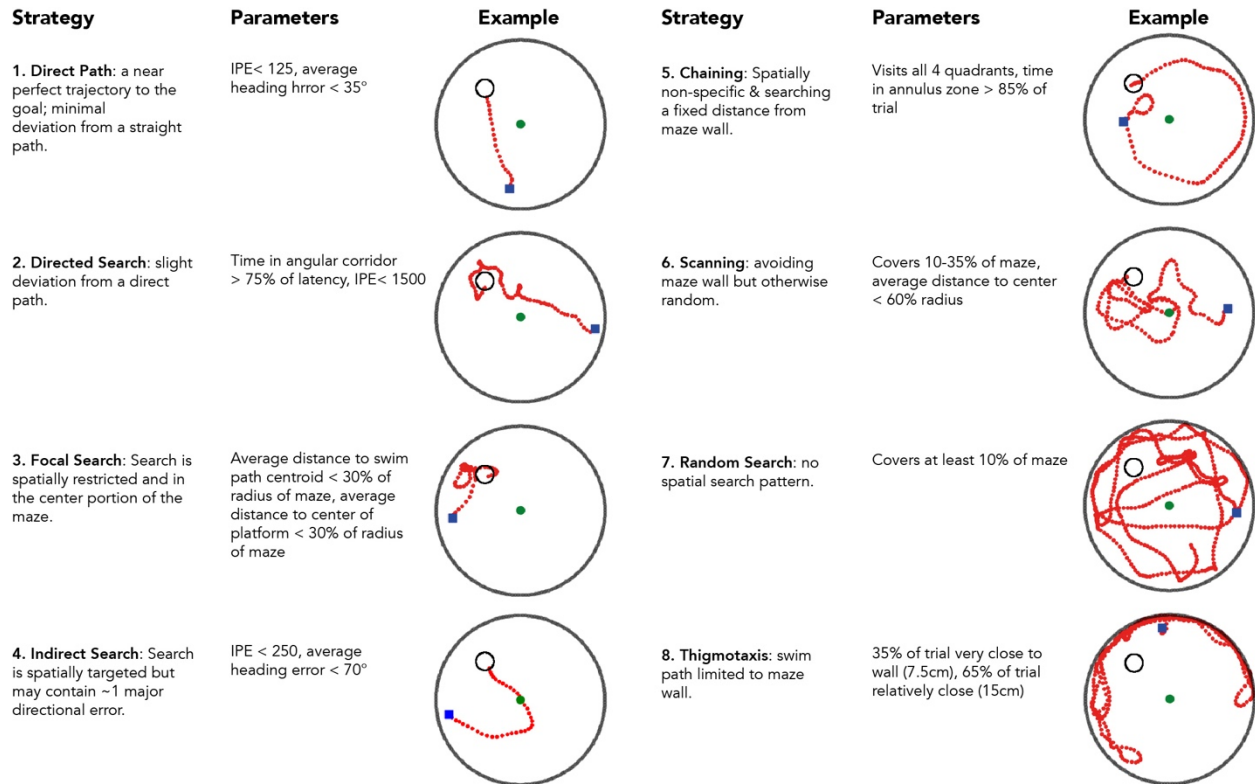

1  
2 Figure 2: Search strategies and associated parameters. Pathfinder categorizes each trial  
3 according to 1 of 8 possible strategies. Categorization proceeds sequentially in the order  
4 shown (unless some strategies are excluded from the analysis). For example, for a trial to be  
5 classified as Random Search, the path must cover a minimum proportion of the maze *and* not  
6 fit any of the criteria for strategies 1-6. In the examples shown, the blue square indicates the  
7 start point and the green circle indicates the middle of the pool. Parameter settings are those  
8 used in the present study, and should be adjusted depending on changes to testing  
9 procedures and maze geometry.

10  
11  
12  
13  
14  
15  
16  
17  
18  
19  
20

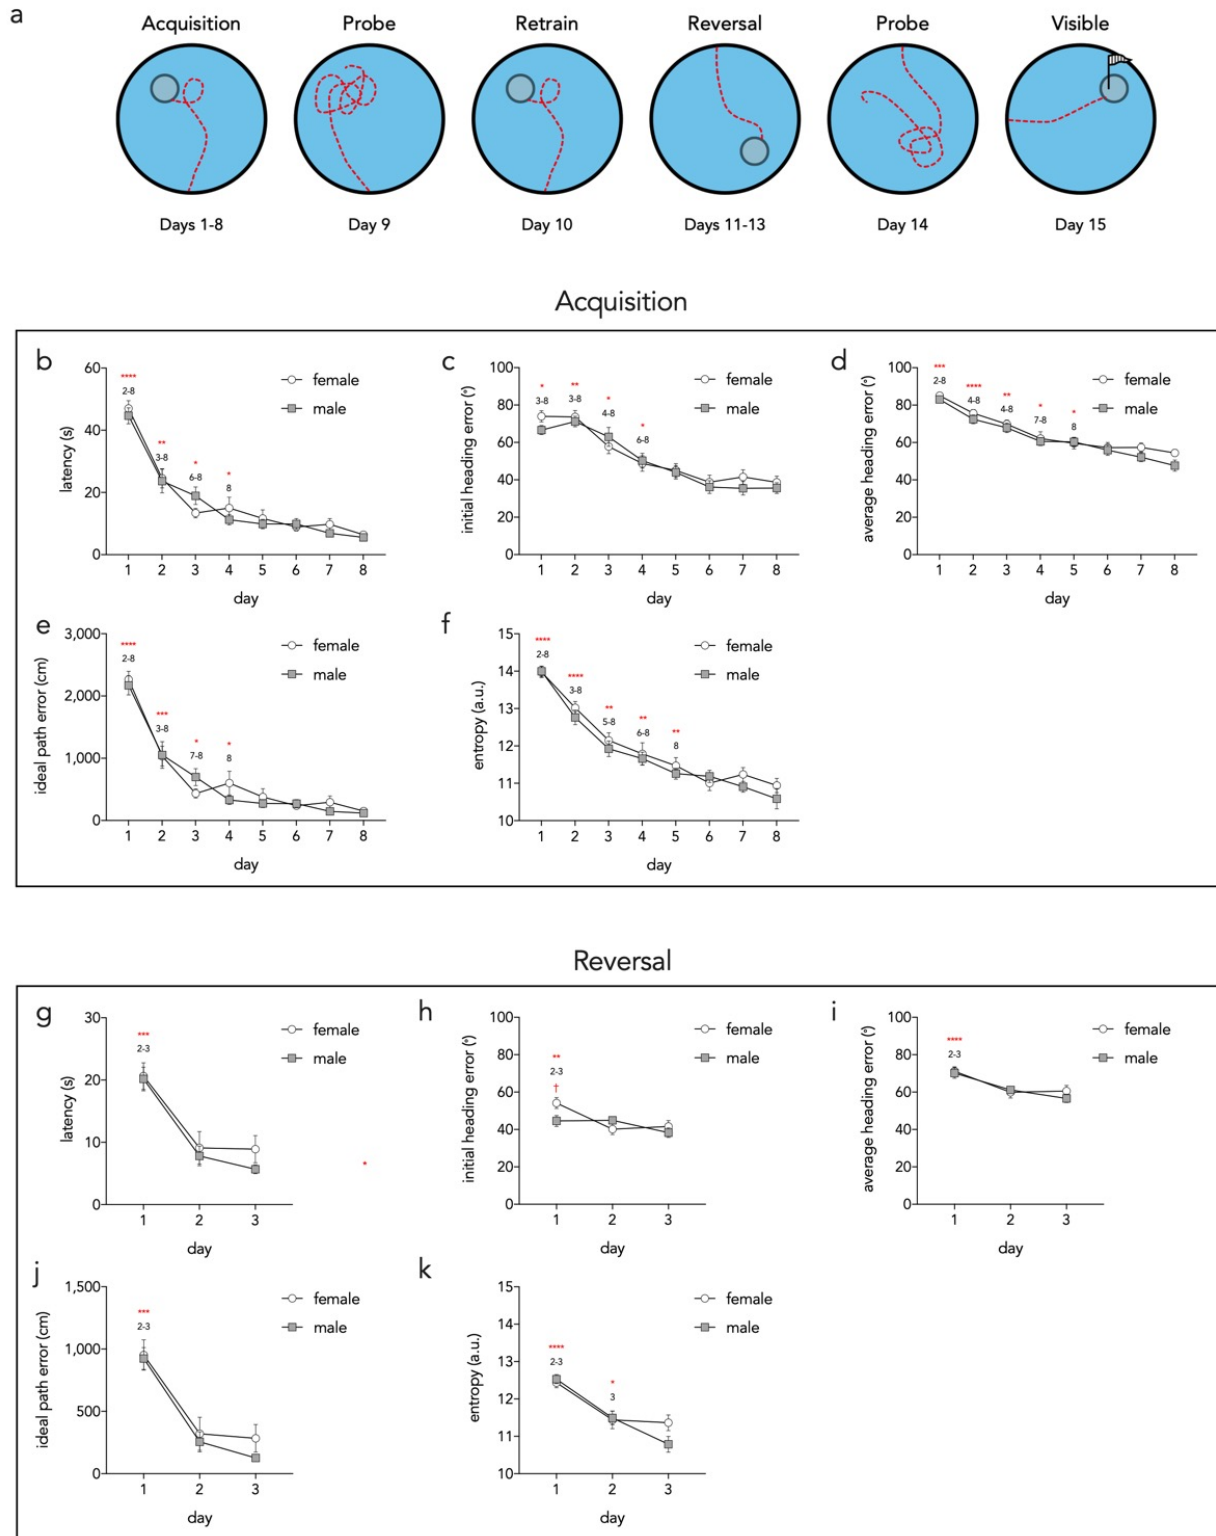

1

1 Figure 3: Acquisition and reversal performance as assessed by individual parameters. a)  
2 Schematic outline of full behavioral paradigm. Individual performance metrics were analyzed  
3 for acquisition (b-f) and reversal (g-k) stages of testing. b) Latency to reach the platform  
4 decreased across days (day effect  $F_{7,231}=75$ ,  $P<0.0001$ ; sex effect  $F_{1,33}=0.3$ ,  $P=0.6$ ; interaction  
5  $F_{7,231}=0.9$ ,  $P=0.5$ ). Asterisks denote statistically significant differences from the subsequent days  
6 that are indicated by the numbers. c) Initial heading error decreased over days (day effect  
7  $F_{7,231}=39$ ,  $P<0.0001$ ; sex effect  $F_{1,33}=0.4$ ,  $P=0.6$ ; interaction  $F_{7,231}=0.7$ ,  $P=0.6$ ). d) Average  
8 heading error decreased over days (day effect  $F_{7,231}=48$ ,  $P<0.0001$ ; sex effect  $F_{1,33}=2.5$ ,  $P=0.12$ ;  
9 interaction  $F_{7,231}=0.6$ ,  $P=0.8$ ). e) Idea path error decreased over days (day effect  $F_{7,231}=79$ ,  
10  $P<0.0001$ ; sex effect  $F_{1,33}=0.3$ ,  $P=0.6$ ; interaction  $F_{7,231}=1.0$ ,  $P=0.4$ ). f) Entropy decreased over  
11 days (day effect  $F_{7,231}=75$ ,  $P<0.0001$ ; sex effect  $F_{1,33}=1.3$ ,  $P=0.3$ ; interaction  $F_{7,231}=0.5$ ,  $P=0.8$ ). g)  
12 Latency decreased over days (day effect  $F_{2,66}=69$ ,  $P<0.0001$ ; sex effect  $F_{1,33}=0.5$ ,  $P=0.5$ ;  
13 interaction  $F_{2,66}=0.7$ ,  $P=0.5$ ). h) Initial heading error decreased over days and was greater in  
14 females on day 1 (day effect  $F_{2,66}=9$ ,  $P<0.001$ ; sex effect  $F_{1,33}=1.0$ ,  $P=0.3$ ; interaction  $F_{2,66}=4.7$ ,  
15  $P=0.01$ ). i) Average heading error decreased over days (day effect  $F_{2,66}=21$ ,  $P<0.0001$ ; sex  
16 effect  $F_{1,33}=0.2$ ,  $P=0.7$ ; interaction  $F_{2,66}=0.9$ ,  $P=0.4$ ). j) Ideal path error decreased over days (day  
17 effect  $F_{2,66}=98$ ,  $P<0.0001$ ; sex effect  $F_{1,33}=0.5$ ,  $P=0.5$ ; interaction  $F_{2,66}=0.7$ ,  $P=0.5$ ). k) Entropy  
18 decreased over days (day effect  $F_{2,66}=39$ ,  $P<0.0001$ ; sex effect  $F_{1,33}=0.6$ ,  $P=0.4$ ; interaction  
19  $F_{2,66}=2.6$ ,  $P=0.08$ ). \* $P<0.05$ , \*\* $P<0.01$ , \*\*\* $P<0.001$ , \*\*\*\* $P<0.0001$ , † $P<0.05$  within day, male vs  
20 female comparison. Symbols = mean  $\pm$  standard error.

21

22

23

24

25

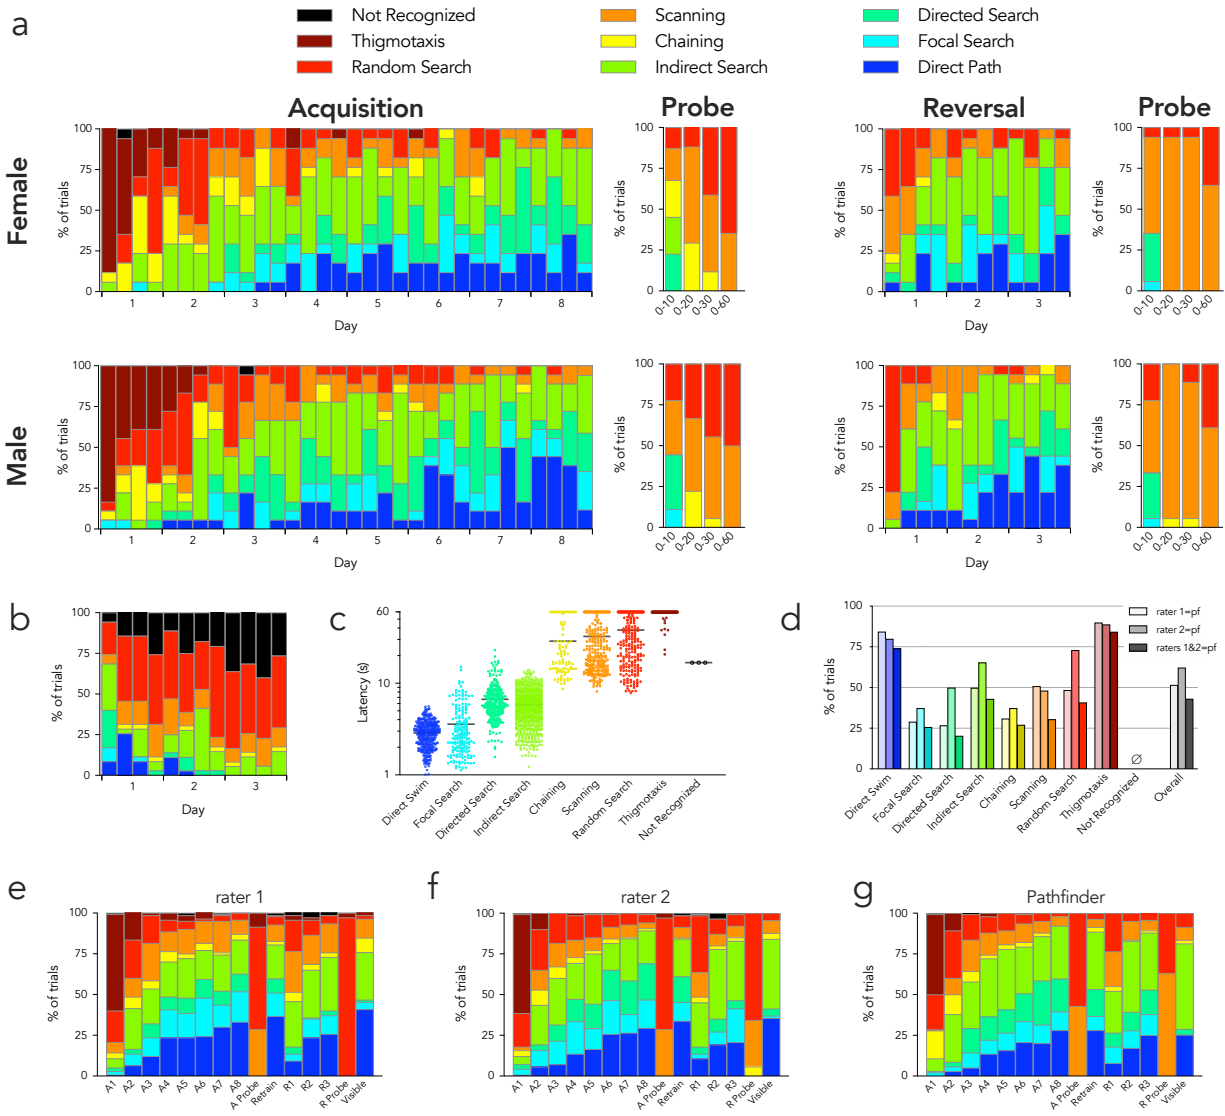

1  
 2 Figure 4: Pathfinder search strategy categorization of water maze performance. a) Search strategies for male and  
 3 female mice. Each set of stacked bars indicates strategies used for the 4 acquisition and reversal trials for each day.  
 4 Probe strategies are shown for the entire trial (0-60s) and for the first 10, 20 and 30s. b) Reversal strategies relative  
 5 to the original platform location (indirect search excluded from analyses, since short swims that bypass the old  
 6 location but quickly go to the new location become incorrectly classified as indirect searches with current settings).  
 7 c) Escape latencies for all 1888 trials varied by strategy. Symbols indicate individual trials, bars indicate means  
 8 (Kruskal Wallis test,  $P < 0.0001$ ; Dunn's tests: direct path vs all others except focal search,  $P < 0.0001$ ; focal search vs  
 9 all others except direct path,  $P < 0.0001$ ; directed search vs all others except indirect search,  $P < 0.0001$ ; indirect  
 10 search vs all others except directed search,  $P < 0.0001$ ; chaining vs all others except scanning and random,  $P < 0.01$ ;  
 11 scanning vs all others except chaining and thigmotaxis,  $P < 0.01$ ; random vs all others except chaining,  $P < 0.05$ ;  
 12 thigmotaxis vs all others except random search,  $P < 0.05$ ). d) Manual vs automatic categorization. For each strategy  
 13 assigned by Pathfinder, the proportion that received the same classification (manually) by 2 raters is shown. "Raters  
 14 1+2" indicates the percentage of Pathfinder classified-trials that also received the same classification by both raters.  
 15 e) Search strategy classification by rater 1 for each day of testing. f) Search strategy classification by rater 2 for each  
 16 day of testing. g) Search strategy classification by Pathfinder for each day of testing.



1

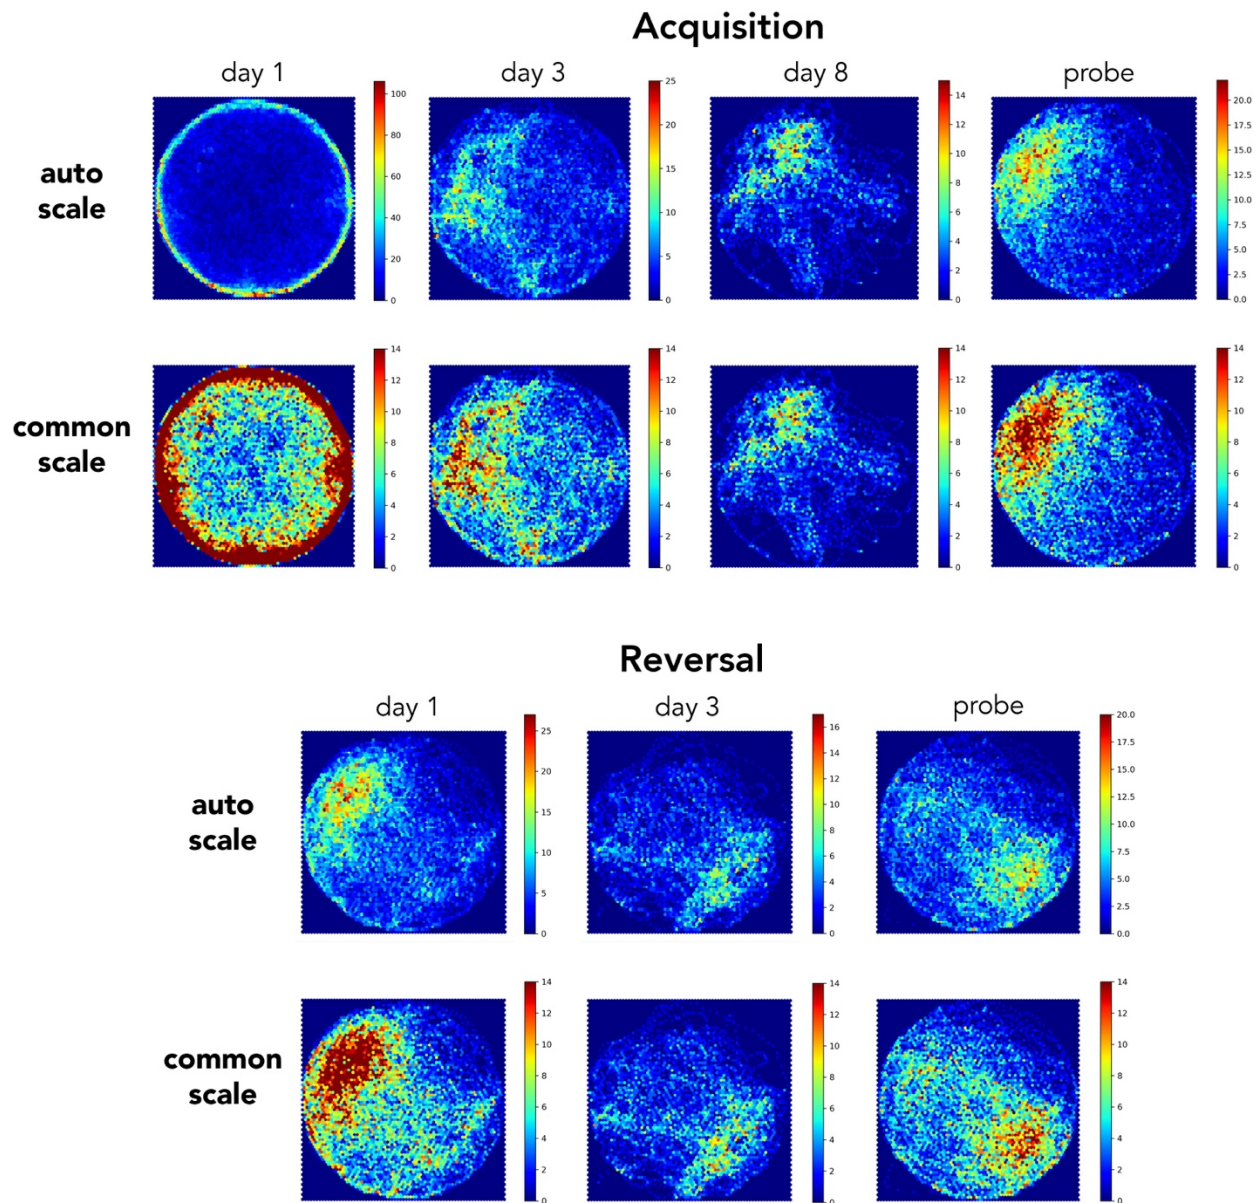

2

3 Figure 5: Heatmap visualization of spatial occupancy. Examples of heatmaps for various testing  
4 days (all trials from both sexes combined). Top rows: heatmaps were automatically scaled by  
5 Pathfinder, to occupy the full color spectrum and facilitate visualization of spatial occupancy  
6 within a given day. Bottom rows: heatmaps were set to a common scale, to facilitate  
7 comparison across days. Scale indicates number of samples within a spatial bin.

8

1 REFERENCES

- 2
- 3 1. Kjelstrup, K. G. *et al.* Reduced fear expression after lesions of the ventral hippocampus.  
4 *Proc Natl Acad Sci USA* **99**, 10825–10830 (2002).
  - 5 2. Bannerman, D. M. *et al.* Double dissociation of function within the hippocampus: spatial  
6 memory and hyponeophagia. *Behav Neurosci* **116**, 884–901 (2002).
  - 7 3. Morris, R. G. M. Spatial localization does not require the presence of local cues. *Learning*  
8 *and Motivation* **12**, 239–260 (1981).
  - 9 4. McDonald, R. J. & White, N. M. A triple dissociation of memory systems: Hippocampus,  
10 amygdala, and dorsal striatum. *Behav Neurosci* **107**, 3–22 (1993).
  - 11 5. Hamilton, D. A., Rosenfelt, C. S. & Wishaw, I. Q. Sequential control of navigation by  
12 locale and taxon cues in the Morris water task. *Behav Brain Res* **154**, 385–397 (2004).
  - 13 6. Richards, B. A. *et al.* Patterns across multiple memories are identified over time. *Nat*  
14 *Neurosci* **17**, 981–986 (2014).
  - 15 7. Penner, M. R. & Mizumori, S. J. Y. Neural systems analysis of decision making during  
16 goal-directed navigation. *Prog Neurobiol* **96**, 96–135 (2012).
  - 17 8. Graziano, A., Petrosini, L. & Bartoletti, A. Automatic recognition of explorative strategies  
18 in the Morris water maze. *J Neurosci Methods* **130**, 33–44 (2003).
  - 19 9. Gallagher, M., Burwell, R. & Burchinal, M. Severity of spatial learning impairment in  
20 aging: development of a learning index for performance in the Morris water maze. *Behav*  
21 *Neurosci* **107**, 618–626 (1993).
  - 22 10. Wishaw, I. Q. & Jarrard, L. E. Similarities vs. differences in place learning and circadian  
23 activity in rats after fimbria-fornix section or ibotenate removal of hippocampal cells.  
24 *Hippocampus* **5**, 595–604 (1995).
  - 25 11. Wolfer, D. P., Madani, R., Valenti, P. & Lipp, H. P. Extended analysis of path data from  
26 mutant mice using the public domain software Wintrack. *Physiol Behav* **73**, 745–753  
27 (2001).
  - 28 12. Dalm, S., Grootendorst, J., de Kloet, E. R. & Oitzl, M. S. Quantification of swim patterns  
29 in the Morris water maze. *Behav Res Methods Instrum Comput* **32**, 134–139 (2000).
  - 30 13. Balschun, D. *et al.* Does cAMP response element-binding protein have a pivotal role in  
31 hippocampal synaptic plasticity and hippocampus-dependent memory? *J Neurosci* **23**,  
32 6304–6314 (2003).
  - 33 14. Schoenfeld, R., Moenich, N., Mueller, F.-J., Lehmann, W. & Lепlow, B. Search strategies  
34 in a human water maze analogue analyzed with automatic classification methods. *Behav*  
35 *Brain Res* **208**, 169–177 (2010).
  - 36 15. Schoenfeld, R., Schiffelholz, T., Beyer, C., Lепlow, B. & Foreman, N. Variants of the  
37 Morris water maze task to comparatively assess human and rodent place navigation.  
38 *Neurobiol Learn Mem* **139**, 117–127 (2017).
  - 39 16. Ruediger, S., Spirig, D., Donato, F. & Caroni, P. Goal-oriented searching mediated by  
40 ventral hippocampus early in trial-and-error learning. *Nat Neurosci* **15**, 1563–1571  
41 (2012).

- 1 17. Vouros, A. *et al.* A generalised framework for detailed classification of swimming paths  
2 inside the Morris Water Maze. *Sci Rep* **8**, 15089 (2018).
- 3 18. Illouz, T., Madar, R., Louzon, Y., Griffioen, K. J. & Okun, E. Unraveling cognitive traits  
4 using the Morris water maze unbiased strategy classification (MUST-C) algorithm. *Brain*  
5 *Behav Immun* **52**, 132–144 (2016).
- 6 19. Rogers, J., Churilov, L., Hannan, A. J. & Renoir, T. Search strategy selection in the Morris  
7 water maze indicates allocentric map formation during learning that underpins spatial  
8 memory formation. *Neurobiol Learn Mem* **139**, 37–49 (2017).
- 9 20. Garthe, A., Behr, J. & Kempermann, G. Adult-generated hippocampal neurons allow the  
10 flexible use of spatially precise learning strategies. *PLoS ONE* **4**, e5464 (2009).
- 11 21. Janus, C. Search strategies used by APP transgenic mice during navigation in the Morris  
12 water maze. *Learn Mem* **11**, 337–346 (2004).
- 13 22. Brody, D. L. & Holtzman, D. M. Morris water maze search strategy analysis in PDAPP  
14 mice before and after experimental traumatic brain injury. *Exp Neurol* **197**, 330–340  
15 (2006).
- 16 23. Faraji, J., Karimi, M., Lawrence, C., Mohajerani, M. H. & Metz, G. A. S. Non-diagnostic  
17 symptoms in a mouse model of autism in relation to neuroanatomy: the BTBR strain  
18 reinvestigated. *Transl Psychiatry* **8**, 234 (2018).
- 19 24. Tucker, L. B., Velosky, A. G. & McCabe, J. T. Applications of the Morris water maze in  
20 translational traumatic brain injury research. *Neuroscience and biobehavioral reviews* **88**,  
21 187–200 (2018).
- 22 25. Gil-Mohapel, J. *et al.* Hippocampal neurogenesis levels predict WATERMAZE search  
23 strategies in the aging brain. *PLoS ONE* **8**, e75125 (2013).
- 24 26. Pennington, Z. T. *et al.* ezTrack: An open-source video analysis pipeline for the  
25 investigation of animal behavior. *bioRxiv* <http://dx.doi.org/10.1101/592592>, (2019).
- 26 27. Tomás Pereira, I. & Burwell, R. D. Using the spatial learning index to evaluate  
27 performance on the water maze. *Behav Neurosci* **129**, 533–539 (2015).
- 28 28. Maei, H. Development and validation of a sensitive entropy-based measure for the water  
29 maze. *Front. Integr. Neurosci.* **3**, (2009).
- 30 29. O'Leary, T. P. & Brown, R. E. Optimization of apparatus design and behavioral measures  
31 for the assessment of visuo-spatial learning and memory of mice on the Barnes maze.  
32 *Learn Mem* **20**, 85–96 (2013).
- 33 30. Steele, R. J. & Morris, R. G. Delay-dependent impairment of a matching-to-place task  
34 with chronic and intrahippocampal infusion of the NMDA-antagonist D-AP5.  
35 *Hippocampus* **9**, 118–136 (1999).
- 36 31. Stone, S. S. D. *et al.* Stimulation of Entorhinal Cortex Promotes Adult Neurogenesis and  
37 Facilitates Spatial Memory. *J Neurosci* **31**, 13469–13484 (2011).
- 38 32. Morris, R. G. M. in *The Maze Book* **94**, 73–92 (Humana Press, New York, NY, 2015).
- 39 33. Maei, H. R., Zaslavsky, K., Teixeira, C. M. & Frankland, P. W. What is the Most Sensitive  
40 Measure of Water Maze Probe Test Performance? *Front. Integr. Neurosci.* **3**, 4 (2009).
- 41 34. Kjelstrup, K. B. *et al.* Finite scale of spatial representation in the hippocampus. *Science*  
42 **321**, 140–143 (2008).

- 1 35. Woitke, F. *et al.* Adult hippocampal neurogenesis poststroke: More new granule cells  
2 but aberrant morphology and impaired spatial memory. *PLoS ONE* **12**, e0183463–16  
3 (2017).
- 4 36. Goodrich-Hunsaker, N. J., Livingstone, S. A., Skelton, R. W. & Hopkins, R. O. Spatial  
5 deficits in a virtual water maze in amnesic participants with hippocampal damage.  
6 *Hippocampus* **20**, 481–491 (2010).
- 7 37. Bartsch, T. *et al.* Focal lesions of human hippocampal CA1 neurons in transient global  
8 amnesia impair place memory. *Science* **328**, 1412–1415 (2010).
- 9 38. Beiko, J., Lander, R., Hampson, E., Boon, F. & Cain, D. P. Contribution of sex differences  
10 in the acute stress response to sex differences in water maze performance in the rat.  
11 *Behav Brain Res* **151**, 239–253 (2004).
- 12 39. Conrad, C. D. *et al.* Acute stress impairs spatial memory in male but not female rats:  
13 influence of estrous cycle. *Pharmacol Biochem Behav* **78**, 569–579 (2004).
- 14 40. Luine, V. N., Beck, K. D., Bowman, R. E., Frankfurt, M. & Maclusky, N. J. Chronic stress  
15 and neural function: accounting for sex and age. *J Neuroendocrinol* **19**, 743–751 (2007).
- 16 41. Gulyás, M., Bencsik, N., Pusztai, S., Liliom, H. & Schlett, K. AnimalTracker: An ImageJ-  
17 Based Tracking API to Create a Customized Behaviour Analyser Program. *Neuroinform*  
18 **14**, 1–3 (2016).
- 19 42. Bannerman, D. M. *et al.* Dissecting spatial knowledge from spatial choice by  
20 hippocampal NMDA receptor deletion. *Nat Neurosci* (2012). doi:10.1038/nn.3166
- 21 43. Arruda-Carvalho, M., Sakaguchi, M., Akers, K. G., Josselyn, S. A. & Frankland, P. W.  
22 Posttraining ablation of adult-generated neurons degrades previously acquired  
23 memories. *J Neurosci* **31**, 15113–15127 (2011).
- 24 44. McDonald, R. J. & White, N. M. Parallel information processing in the water maze:  
25 evidence for independent memory systems involving dorsal striatum and hippocampus.  
26 *Behav Neural Biol* **61**, 260–270 (1994).
- 27 45. Snyder, J. S., Cahill, S. P. & Frankland, P. W. Running promotes spatial bias  
28 independently of adult neurogenesis. *Hippocampus* **31**, 15113 (2017).
- 29 46. Yu, R. Q., Cooke, M., Zhao, J. & Snyder, J. S. Adult neurogenesis promotes efficient,  
30 nonspecific search strategies in a spatial alternation water maze task. *bioRxiv* (2019).  
31 doi:10.1101/637462
- 32 47. Redish, A. D. Vicarious trial and error. *Nat Rev Neurosci* **17**, 147–159 (2016).
- 33 48. Hollup, S. A., Kjelstrup, K. G., Hoff, J., Moser, M. B. & Moser, E. I. Impaired recognition  
34 of the goal location during spatial navigation in rats with hippocampal lesions. *J*  
35 *Neurosci* **21**, 4505–4513 (2001).
- 36 49. Wishaw, I. Q., Cassel, J. C. & Jarrad, L. E. Rats with fimbria-fornix lesions display a  
37 place response in a swimming pool: a dissociation between getting there and knowing  
38 where. *J Neurosci* **15**, 5779–5788 (1995).
- 39 50. Schenk, F. A homing procedure for studying spatial memory in immature and adult  
40 rodents. *J Neurosci Methods* **26**, 249–258 (1989).
- 41 51. Maaswinkel, H., Jarrard, L. E. & Wishaw, I. Q. Hippocampectomized rats are impaired in  
42 homing by path integration. *Hippocampus* **9**, 553–561 (1999).

- 1 52. Valente, D., Golani, I. & Mitra, P. P. Analysis of the trajectory of *Drosophila melanogaster*  
2 in a circular open field arena. *PLoS ONE* **2**, e1083 (2007).
- 3 53. Eilam, D. & Golani, I. Home base behavior of rats (*Rattus norvegicus*) exploring a novel  
4 environment. *Behav Brain Res* **34**, 199–211 (1989).
- 5 54. Dvorkin, A., Szechtman, H. & Golani, I. Knots: attractive places with high path tortuosity  
6 in mouse open field exploration. *PLoS Comput Biol* **6**, e1000638 (2010).
- 7 55. Leutgeb, S. *et al.* Independent Codes for Spatial and Episodic Memory in Hippocampal  
8 Neuronal Ensembles. *Science* **309**, 619–623 (2005).
- 9 56. Tsao, A., Moser, M.-B. & Moser, E. I. Traces of Experience in the Lateral Entorhinal  
10 Cortex. *Curr Biol* **23**, 399–405 (2013).
- 11 57. Deshmukh, S. S. & Knierim, J. J. Representation of non-spatial and spatial information in  
12 the lateral entorhinal cortex. *Front Behav Neurosci* **5**, 69 (2011).
- 13 58. Solstad, T., Boccarda, C. N., Kropff, E., Moser, M.-B. & Moser, E. I. Representation of  
14 geometric borders in the entorhinal cortex. *Science* **322**, 1865–1868 (2008).
- 15 59. Coutrot, A. *et al.* Global Determinants of Navigation Ability. *Curr Biol* **28**, 2861–2866.e4  
16 (2018).
- 17 60. Maguire, E. A., Nannery, R. & Spiers, H. J. Navigation around London by a taxi driver  
18 with bilateral hippocampal lesions. *Brain* **129**, 2894–2907 (2006).
- 19 61. Meister, M. L. R. & Buffalo, E. A. Getting directions from the hippocampus: The neural  
20 connection between looking and memory. *Neurobiol Learn Mem* **134 Pt A**, 135–144  
21 (2016).
- 22 62. Yee, L. T. S. *et al.* The hippocampus uses information just encountered to guide efficient  
23 ongoing behavior. *Hippocampus* **24**, 154–164 (2014).
- 24
